# Supplementary material for: Solution and solid-state characterization of rare silyluranium(iii) complexes
Source: Royal Society of Chemistry journal article supplement (doi:10.1039/d4cc00655k), 2024-01-01
Supplement: d4cc00655k1.pdf [file d4cc00655k1.pdf]

**Supporting Information for**

**Solution and Solid-State Characterization of a Rare  
Silyluranium(III) Complex**

Nathan J. Lin, Matthias Zeller, Suzanne C. Bart\*<sup>[a]</sup>

---

[a] N.J. Lin, Dr. M. Zeller, Prof. Dr. S.C. Bart  
H. C. Brown Laboratory, Department of Chemistry  
Purdue University  
West Lafayette, Indiana 47907  
E-mail: [sbart@purdue.edu](mailto:sbart@purdue.edu)

## Table of Contents

|                                                                                                                                                                            |    |
|----------------------------------------------------------------------------------------------------------------------------------------------------------------------------|----|
| <b>General Considerations</b> .....                                                                                                                                        | 4  |
| Synthesis of [(DME) <sub>4</sub> •K][(DME)•U(I) <sub>2</sub> {Si(SiMe <sub>3</sub> ) <sub>2</sub> SiMe <sub>2</sub> } <sub>2</sub> O] ( <b>Compound 1</b> ).....           | 5  |
| Synthesis of [(18-crown-6)K][(Solv)•U(I) <sub>2</sub> {Si(SiMe <sub>3</sub> ) <sub>2</sub> SiMe <sub>2</sub> } <sub>2</sub> O] ( <b>1-crown</b> ) (Solv = THF or DME)..... | 5  |
| Evans' Method Calculation for <b>1-crown</b> .....                                                                                                                         | 13 |
| Infrared Spectra .....                                                                                                                                                     | 14 |
| <b>Crystallographic Details</b> .....                                                                                                                                      | 15 |
| Crystallographic References .....                                                                                                                                          | 16 |
| <b>Special Refinement Details</b> .....                                                                                                                                    | 17 |
| <b>Tables of Geometric Parameters</b> .....                                                                                                                                | 19 |
| <b>SolidG of Complex 1</b> .....                                                                                                                                           | 21 |
| <b>References</b> .....                                                                                                                                                    | 25 |

## Table of Figures

|                                                                                                                                                                                                                                                                                                                                                                         |    |
|-------------------------------------------------------------------------------------------------------------------------------------------------------------------------------------------------------------------------------------------------------------------------------------------------------------------------------------------------------------------------|----|
| Figure S1. <sup>1</sup> H NMR Spectrum (400 MHz, 26 °C, C <sub>6</sub> D <sub>6</sub> ) of (KSi[SiMe <sub>3</sub> ] <sub>2</sub> SiMe <sub>2</sub> ) <sub>2</sub> O (K <sub>2</sub> L).....                                                                                                                                                                             | 7  |
| Figure S2. <sup>13</sup> C NMR Spectrum (100 MHz, 26 °C, C <sub>6</sub> D <sub>6</sub> ) of (KSi[SiMe <sub>3</sub> ] <sub>2</sub> SiMe <sub>2</sub> ) <sub>2</sub> O (K <sub>2</sub> L). .....                                                                                                                                                                          | 7  |
| Figure S3. <sup>29</sup> Si INEPT NMR Spectrum (79.49 MHz, 26 °C, C <sub>6</sub> D <sub>6</sub> ) of (KSi[SiMe <sub>3</sub> ] <sub>2</sub> SiMe <sub>2</sub> ) <sub>2</sub> O (K <sub>2</sub> L). .....                                                                                                                                                                 | 8  |
| Figure S4. <sup>1</sup> H NMR Spectrum (400 MHz, 25 °C, THF-d <sub>8</sub> ) of <b>1-crown</b> .....                                                                                                                                                                                                                                                                    | 8  |
| Figure S5. <sup>1</sup> H NMR Spectrum (zoomed-in) (400 MHz, 25 °C, THF-d <sub>8</sub> ) of <b>1-crown</b> .....                                                                                                                                                                                                                                                        | 9  |
| Figure S6. <sup>13</sup> C NMR spectrum (and zoom) (100.62 MHz, 25 °C, THF-d <sub>8</sub> ) of <b>1-crown</b> .....                                                                                                                                                                                                                                                     | 9  |
| Figure S7. <sup>29</sup> Si INEPT NMR Spectrum (79.49 MHz, 25 °C, THF-d <sub>8</sub> ) of <b>1-crown</b> . (External Standard = Si(SiMe <sub>3</sub> ) <sub>4</sub> = -9.8 ppm) .....                                                                                                                                                                                   | 10 |
| Figure S8. <sup>29</sup> Si{ <sup>1</sup> H}NMR Spectrum (79.49 MHz, 25 °C, THF-d <sub>8</sub> ) of <b>1-crown</b> . (External Standard = Si(SiMe <sub>3</sub> ) <sub>4</sub> = -9.8 ppm) .....                                                                                                                                                                         | 10 |
| Figure S9. Comparison of <sup>29</sup> Si{ <sup>1</sup> H}NMR Spectra (79.49 MHz, 25 °C, THF-d <sub>8</sub> ) of a purified sample of <b>1-crown</b> (top) and a sample of 0.164 g of <b>1-crown</b> doped with 0.014 g of Si(SiMe <sub>3</sub> ) <sub>4</sub> (a common byproduct) (bottom). (Internal Standard = Si(SiMe <sub>3</sub> ) <sub>4</sub> = -9.8 ppm)..... | 11 |
| Figure S10. <sup>1</sup> H NMR Spectrum (400 MHz, 26 °C, C <sub>6</sub> D <sub>6</sub> ) of <b>1-crown</b> . .....                                                                                                                                                                                                                                                      | 11 |
| Figure S11. <sup>1</sup> H NMR Spectrum (zoomed-in) (400 MHz, 26 °C, C <sub>6</sub> D <sub>6</sub> ) of <b>1-crown</b> . .....                                                                                                                                                                                                                                          | 12 |
| Figure S12. <sup>1</sup> H NMR spectrum (Pyridine-d <sub>5</sub> , 499.83 MHz, 25 °C) of <b>1-crown</b> and a capillary of pyridine-d <sub>5</sub> . .....                                                                                                                                                                                                              | 12 |
| Figure S13. FTIR spectrum (KBr Salt Plate, THF solution) of <b>1-crown</b> . .....                                                                                                                                                                                                                                                                                      | 14 |
| Figure S14. <b>1-crown (DME adduct)</b> 18-crown-6(K <sup>+</sup> ) and solvent molecules removed from the .xyz file. <sup>[5]</sup> .....                                                                                                                                                                                                                              | 21 |

## **Table of Tables**

|                                                                                              |    |
|----------------------------------------------------------------------------------------------|----|
| Table S1. Crystallographic data for compound <b>1</b> and <b>1-crown</b> .....               | 15 |
| Table S2. Selected geometric parameters of compound <b>1</b> (Å, °).....                     | 19 |
| Table S3. Selected geometric parameters of compound <b>1-crown (DME adduct)</b> (Å, °). .... | 19 |
| Table S4. Selected geometric parameters of compound <b>1-crown (THF adduct)</b> (Å, °).....  | 20 |

## General Considerations

All air- and moisture-sensitive manipulations were performed using standard Schlenk techniques or using an MBraun inert atmosphere drybox with an atmosphere of purified nitrogen. The MBraun drybox was equipped with a cold well used for freezing samples with liquid nitrogen, dry ice and acetone baths, as well as two  $-35\text{ }^{\circ}\text{C}$  freezers for cooling samples and crystallizing compounds. Solvents for sensitive manipulations including THF, toluene, and pentane were dried and deoxygenated using literature procedures with a Seca solvent purification system.<sup>[1]</sup> 1,2-dimethoxyethane (DME) was purified by stirring over  $\text{CaH}_2$  for at least two days before distillation and stored over molecular sieves and sodium. THF- $d_8$  was purchased from Cambridge Isotope Laboratories (CIL) and stored over sodium in the glovebox freezer. Pyridine- $d_5$  was purchased from CIL, stirred over  $\text{CaH}_2$ , distilled, and stored over sieves. Benzene- $d_6$  ( $\text{C}_6\text{D}_6$ ) was purchased from CIL, dried with molecular sieves and sodium, and degassed with three freeze-pump-thaw cycles.  $(\text{Me}_3\text{Si})_4\text{Si}$  was purchased from TCI, and  $\text{KOtBu}$ , and 18-crown-6 was purchased from Sigma-Aldrich and used without further purification.  $\text{UI}_3(\text{dioxane})_{1.5}$ <sup>[2]</sup> and  $[\text{Si}(\text{SiMe}_3)_3\text{Si}(\text{Me})_2]_2\text{O}(\text{L})$ <sup>[3]</sup> were synthesized according to literature procedures.

Caution! U-238 is a weak  $\alpha$ -emitter with a half-life of  $t_{1/2} = 4 \times 10^9$  years. All manipulations were performed in an inert-atmosphere glovebox in a laboratory equipped with proper detection equipment.

$^1\text{H}$  NMR spectra were recorded on a Bruker AV400 spectrometer operating at a frequency of 400 MHz.  $^1\text{H}$  NMR chemical shifts are reported relative to  $^1\text{H}$  residual chemical shifts of benzene- $d_6$  ( $\text{C}_6\text{D}_6$ , 7.16 ppm), THF- $d_8$  (1.72 ppm), or pyridine- $d_5$  (8.74 ppm).  $^1\text{H}$  spectra were collected with 0.5 s acquisition time, 0 s delay time, a sweep width of 50 to 400 ppm, and for 128 scans. For paramagnetic molecules, the  $^1\text{H}$  NMR data are reported with the chemical shift, followed by the peak-width-at-half-height in Hertz, the integration value, multiplicity, and, where possible, the peak assignment. Multiplicities are assigned as singlet (s), doublet (d), triplet (t), or multiplet (m), and some moieties are abbreviated as trimethylsilyl ( $\text{Me}_3\text{Si}$  or  $\text{SiMe}_3$ ).  $^{13}\text{C}$  NMR spectra were recorded on a Bruker AV400 spectrometer operating at a frequency of 100.62 MHz and referenced to the internal solvent signal.  $^{13}\text{C}$  NMR spectra were collected with 0.08 s acquisition time, 0.1 s delay time, 400 ppm sweep width, and at least 1024 scans.  $^{29}\text{Si}$  NMR spectra were recorded on a Bruker AV400 spectrometer operating at a frequency of 79.49 MHz and sometimes with the  $^{29}\text{Si}$  INEPT pulse sequence.<sup>[4]</sup>  $^{29}\text{Si}$  NMR spectra are referenced to an external or internal standard ( $(\text{Me}_3\text{Si})_4\text{Si}$ , -9.8 ppm and/or -135.5 ppm).  $^{29}\text{Si}$  NMR spectra were collected using 0.5 s acquisition time and 1 s delay time. Data were collected for at least 30 minutes or until sufficient s/n (8:1) was achieved using a highly concentrated sample ( $> 300\text{ mg}$  **1-crown** in  $\sim 0.5\text{ mL}$ ,  $\sim 0.43\text{ M}$ ). The 600 ppm scan window was moved between -1000 to +1000 ppm to search for other  $^{29}\text{Si}$  signals. Solid state infrared spectra were recorded using a Thermo Nicolet 6700 spectrophotometer; samples were made by dropping and drying a concentrated THF solution of **1-crown** on a KBr salt plate and data notated as weak (w), medium (m), and strong (s). Electronic absorption spectroscopic measurements were recorded at 294 K in sealed 1 cm quartz cuvettes with a JASCO V-770 UV/vis-NIR spectrophotometer. CHN Elemental analysis was performed at Midwest Microlabs (Indianapolis, IN).

Single crystals suitable for X-ray diffraction of **1**, **1-crown (THF adduct)**, and **1-crown (DME adduct)**, were coated with poly(isobutylene) oil in the glovebox and quickly transferred to the goniometer head of a Bruker Quest diffractometer with a fixed chi angle, a sealed tube fine focus X-ray tube, single crystal curved graphite incident beam monochromator, a Photon II area

detector and an Oxford Cryosystems low temperature device. Examination and data collection were performed with Mo K $\alpha$  radiation ( $\lambda = 0.71073 \text{ \AA}$ ) at 150 K.

### Synthetic Procedures

#### Synthesis of [(DME)<sub>4</sub>•K][(DME)•U(I)<sub>2</sub>{Si(SiMe<sub>3</sub>)<sub>2</sub>SiMe<sub>2</sub>}<sub>2</sub>O] (Compound **1**)

A 20-mL scintillation vial was charged with a stirbar, [Si(SiMe<sub>3</sub>)<sub>3</sub>Si(Me)<sub>2</sub>]<sub>2</sub>O (“TMS<sub>2</sub>L”, 0.042 g, 0.067 mmol), KOtBu (2.05 equiv., 0.016 g, 0.134 mmol), and DME (4 mL). The mixture was allowed to stir at ambient temperature, turning from a colorless suspension to a yellow mixture overnight, forming “K<sub>2</sub>L”. The vial was placed under vacuum to remove volatiles including Me<sub>3</sub>SiO<sup>t</sup>Bu and DME. The yellow oil was redissolved in DME (2 mL) and placed in the freezer at –35 °C. A separate, clean 20-mL scintillation vial was charged with a stirbar, UI<sub>3</sub>•(dioxane)<sub>1.5</sub> (1 equiv., 0.050 g, 0.067 mmol), and DME (10 mL) which was cooled in the freezer at –35 °C. After sufficient cooling, the yellow “K<sub>2</sub>L” solution was added dropwise to the dark purple suspension of UI<sub>3</sub> over the course of 2 min. The mixture was allowed to stir at ambient temperature for 30 min turning an intense, dark blue color. The solution was filtered through a bed of Celite and the filter cake was washed with THF (3 x 5 mL) into a filter flask, leaving a white precipitate in the frit. The volume was carefully reduced *in vacuo* to approximately 1 mL. Crystals suitable for X-ray diffraction were grown from slow vapor diffusion of pentane into the concentrated DME solution of **1**. Crystals of compound **1** will decompose upon drying therefore the yield of the reaction could not be obtained.

#### Synthesis of [(18-crown-6)K][(Solv)•U(I)<sub>2</sub>{Si(SiMe<sub>3</sub>)<sub>2</sub>SiMe<sub>2</sub>}<sub>2</sub>O] (**1-crown**) (Solv = THF or DME)

A 20-mL scintillation vial was charged with a stirbar, [Si(SiMe<sub>3</sub>)<sub>3</sub>Si(Me)<sub>2</sub>]<sub>2</sub>O (“TMS<sub>2</sub>L”, 0.453 g, 0.723 mmol), KOtBu (2.05 equiv., 0.181 g, 1.482 mmol), and DME (10 mL). The mixture was allowed to stir at ambient temperature, turning from a colorless suspension to a yellow mixture overnight, forming “K<sub>2</sub>L”. The vial was placed under vacuum to remove volatiles including Me<sub>3</sub>SiO<sup>t</sup>Bu and DME. The yellow oil was redissolved in DME (4 mL) and placed in the freezer at –35 °C. A separate, clean 20-mL scintillation vial was charged with a stirbar, UI<sub>3</sub>•(dioxane)<sub>1.5</sub> (1 equiv., 0.542 g, 0.723 mmol), and DME (15 mL) which was cooled in the freezer at –35 °C. After sufficient cooling, the yellow “K<sub>2</sub>L” solution was added dropwise to the dark purple suspension of UI<sub>3</sub> over the course of 2 min. The mixture was allowed to stir at ambient temperature for 45 min turning an intense, dark blue color. The solution was filtered through a bed of Celite and the filter cake was washed with THF (3 x 10 mL) into a filter flask, leaving a white precipitate in the frit. To the blue solution in the flask was added a stirbar and 18-crown-6 (1 equiv., 0.191 g, 0.723 mmol) which was then allowed to stir at ambient temperature for 1 hr. Volatiles were removed *in vacuo*, triturated with pentane (3 x 5 mL) and dried again, and the solids were transferred to a clean frit. The solids were washed with pentane (5 x 5 mL), Et<sub>2</sub>O (1 x 5 mL), toluene (1 x 2 mL), and pentane again (1 x 5 mL), leaving a blue filter cake which was characterized as **1-crown** (0.869 g, 88 % yield) which when stored in the freezer as a solid turns dark aquamarine. Crystals suitable for X-ray diffraction were grown from slow vapor diffusion of pentane into a concentrated Et<sub>2</sub>O solution of **1-crown** affording **1-crown (DME adduct)** or grown from slow vapor diffusion of pentane into a concentrated THF solution of **1-crown** affording **1-crown (THF adduct)**.

Alternatively, 2 equiv. of 18-crown-6 can be added to K<sub>2</sub>L (thereby forming [K(18-crown-6)]<sub>2</sub>L) stirring for 2 hours before metalation with UI<sub>3</sub>(dioxane)<sub>1.5</sub>, though purity of the final sample

does result in more 18-crown-6 than necessary for sequestration. It is recommended to add 1 equiv. 18-crown-6 after metalation to avoid excess contamination of unused 18-crown-6.

**1-crown** is insoluble in pentane and hexane, is slightly soluble in diethyl ether, toluene, and benzene, soluble in THF, DME, and pyridine, and is unstable in MeCN and DCM.

$^1\text{H}$  NMR (THF- $d_8$ , 25 °C, 400 MHz)  $\delta$  (ppm): -0.79 (5.09, 36H, s, SiMe<sub>3</sub>), 2.67 (2.54, s, 24H, 18-crown-6), 3.24 (2.90, 4H, s, DME), 8.76 (9.42, 8H, s, SiMe<sub>2</sub>).  $^{13}\text{C}$  NMR (THF- $d_8$ , 25°C, 100.06 MHz)  $\delta$  (ppm): -13.01 (s, SiMe<sub>2</sub>), 28.16 (s, SiMe<sub>3</sub>), 70.13 (s, 18-crown-6).  $^{29}\text{Si}$  INEPT NMR (THF- $d_8$ , 25 °C, 79.49 MHz)  $\delta$  (ppm): -49.96 (SiMe<sub>3</sub>).  $^{29}\text{Si}\{^1\text{H}\}$  NMR (THF- $d_8$ , 25 °C, 79.49 MHz)  $\delta$  (ppm): -49.96 (SiMe<sub>3</sub>).  $^1\text{H}$  NMR (C<sub>6</sub>D<sub>6</sub>, 26 °C, 400 MHz)  $\delta$  (ppm): -6.41 (11.30, 36H, s, SiMe<sub>3</sub>), 3.19 (4.36, s, 361H, 18-crown-6/DME), 3.35 (3.63, 4H, s, DME), 19.98 (16.27, 8H, s, SiMe<sub>2</sub>).  $^1\text{H}$  NMR (Pyridine- $d_5$ , 26 °C, 400 MHz)  $\delta$  (ppm): -0.10 (6.04, s, SiMe<sub>3</sub>), 3.38 (2.44, s, 18-crown-6), 9.08 (41.37, s, SiMe<sub>2</sub>). FTIR (THF, KBr Salt plate) 527 (w), 621 (m), 673 (m), 774 (m), 832 (s), 911 (w), 960 (m), 1029 (m), 1106 (s), 1244 (m), 1283(w), 1350 (m), 1452 (w), 2885 (m), 2944 (m). Elemental analysis: Anal. Calcd. for C<sub>28</sub>H<sub>72</sub>USi<sub>8</sub>O<sub>7</sub>KI<sub>2</sub>: C: 26.35 %, H: 5.69 %, N: 0.00 %; Found: C: 25.85 %, H: 4.87 %, N: 0.00 %.

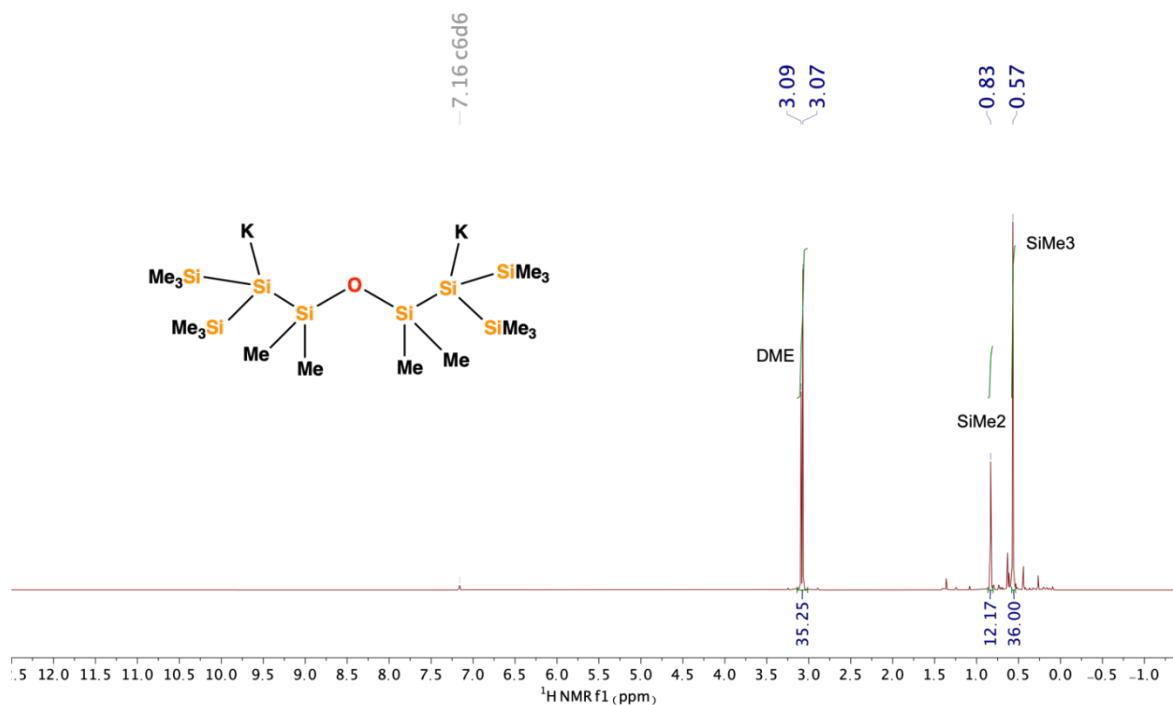

Figure S1. <sup>1</sup>H NMR Spectrum (400 MHz, 26 °C, C<sub>6</sub>D<sub>6</sub>) of (KSi[SiMe<sub>3</sub>]<sub>2</sub>SiMe<sub>2</sub>)<sub>2</sub>O (K<sub>2</sub>L).

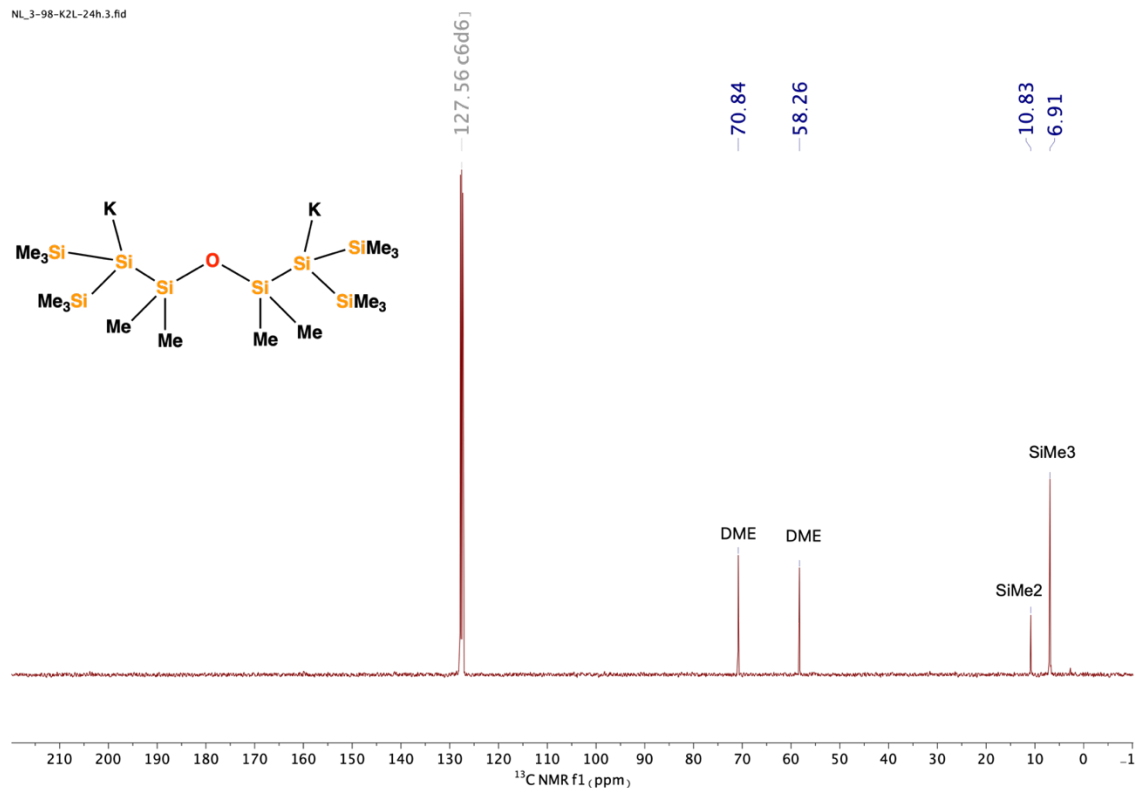

Figure S2. <sup>13</sup>C NMR Spectrum (100 MHz, 26 °C, C<sub>6</sub>D<sub>6</sub>) of (KSi[SiMe<sub>3</sub>]<sub>2</sub>SiMe<sub>2</sub>)<sub>2</sub>O (K<sub>2</sub>L).

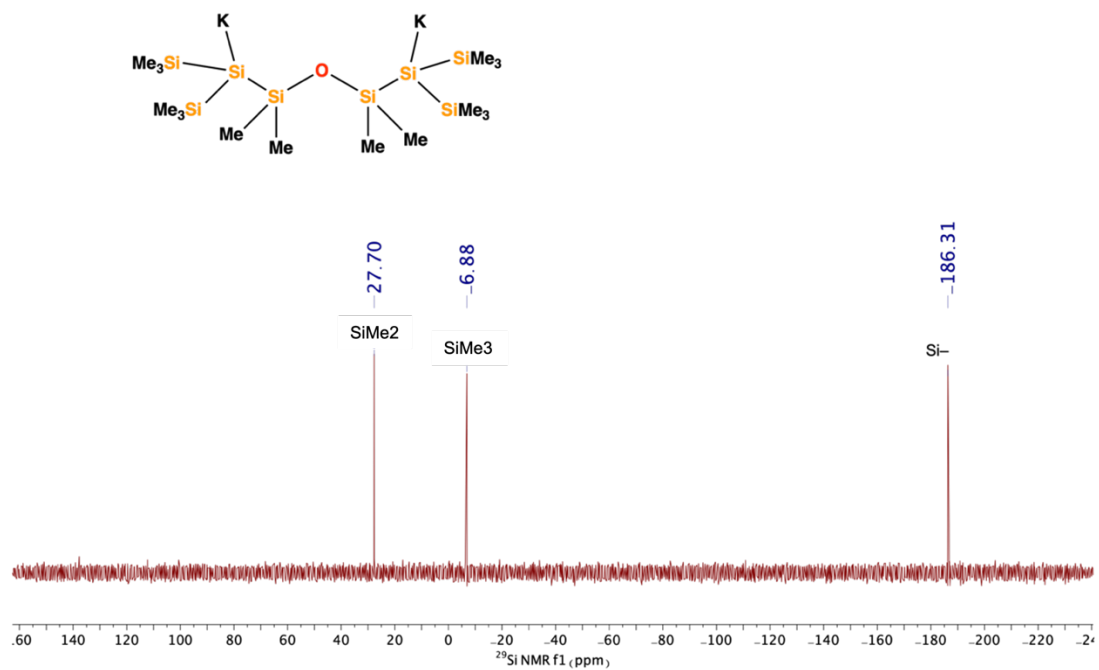

Figure S3.  $^{29}\text{Si}$  INEPT NMR Spectrum (79.49 MHz, 26 °C,  $\text{C}_6\text{D}_6$ ) of  $(\text{KSi}[\text{SiMe}_3]_2\text{SiMe}_2)_2\text{O}$  ( $\text{K}_2\text{L}$ ).

1-crown-300mgconc.1.fid  
H1 standard parameters, BBO SmartProbe.

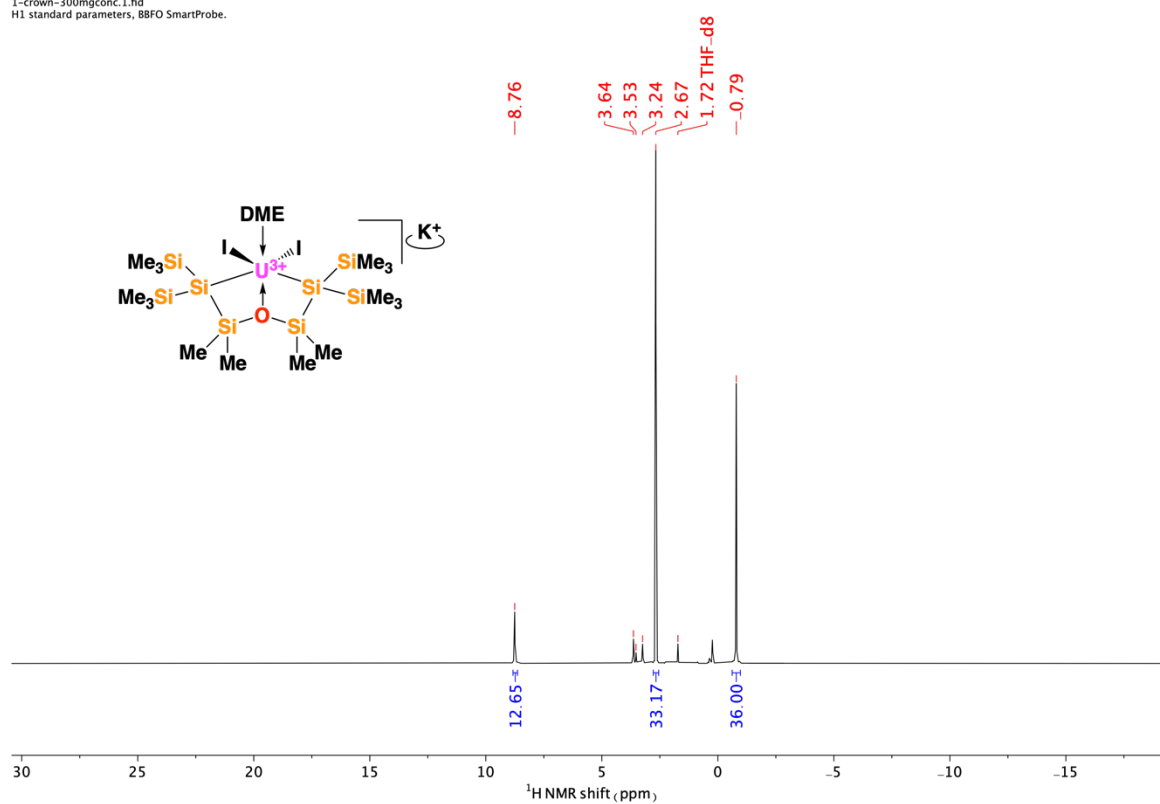

Figure S4.  $^1\text{H}$  NMR Spectrum (400 MHz, 25 °C,  $\text{THF-}d_8$ ) of **1-crown**.



1-crown-300mgconc.1.fid  
H1 standard parameters, BBFO SmartProbe.

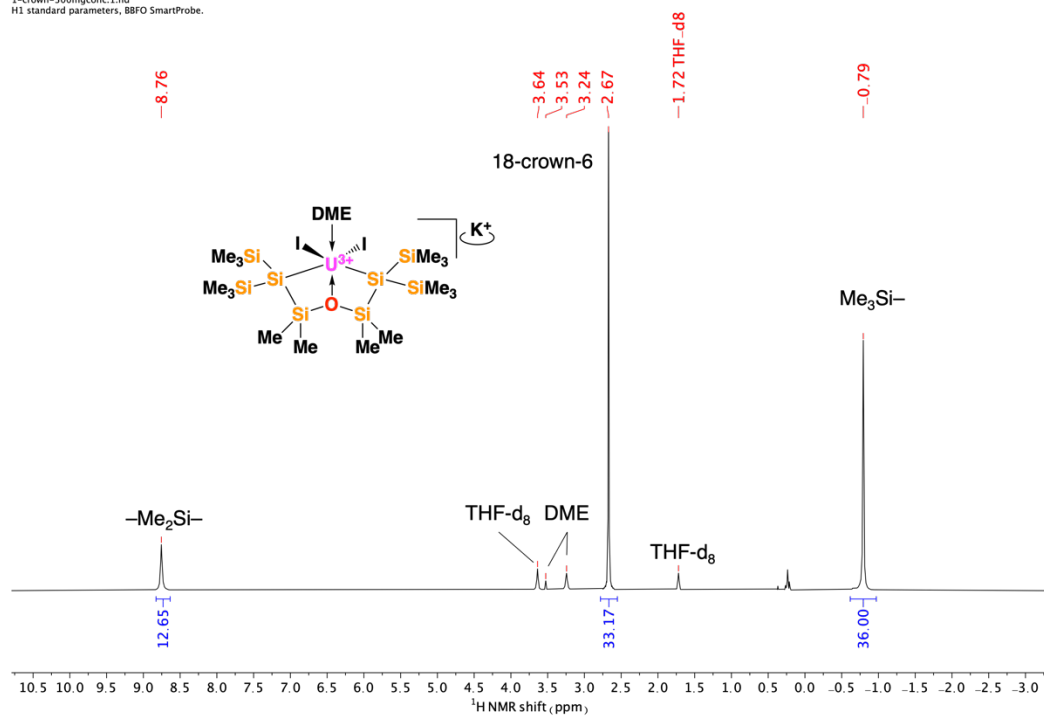

Figure S5. <sup>1</sup>H NMR Spectrum (zoomed-in) (400 MHz, 25 °C, THF-d<sub>8</sub>) of **1-crown**.

1-crown-300mgconc.8.fid  
C13 standard parameters, BBFO SmartProbe.

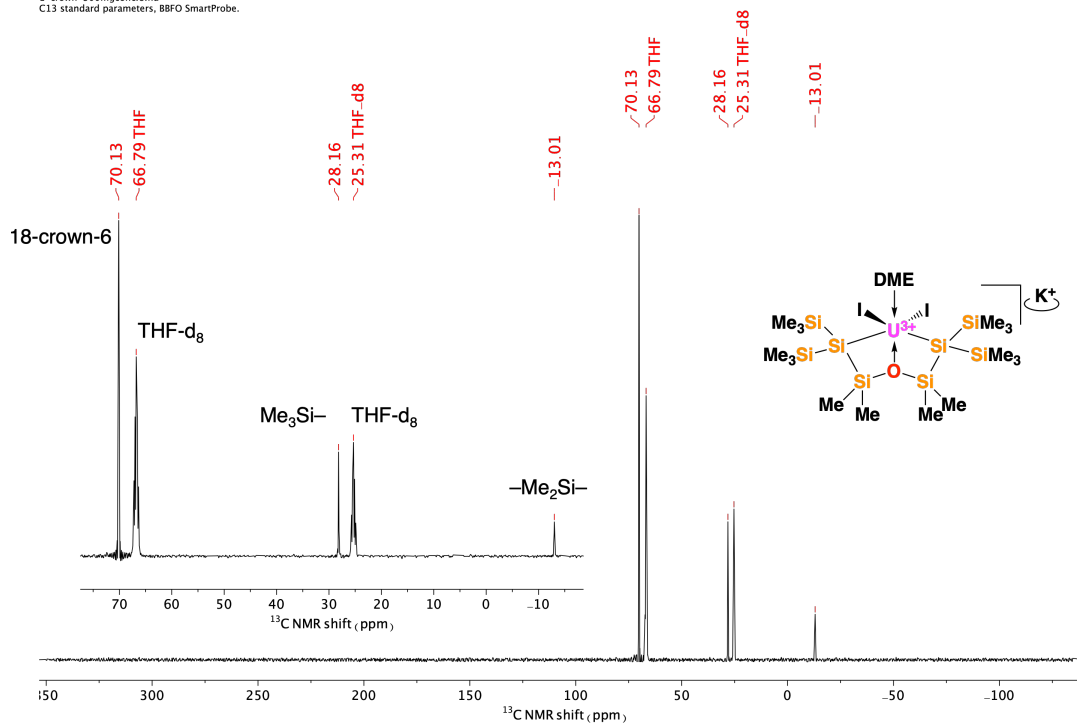

Figure S6. <sup>13</sup>C NMR spectrum (and zoom) (100.62 MHz, 25 °C, THF-d<sub>8</sub>) of **1-crown**.

1-crown-300mgconc.2.fid  
S129 INEPTD standard parameters with 1H decoupling, J(Si-H) = 7 Hz., BBFO SmartProbe.  
at=0.5  
d1=1  
INEPT

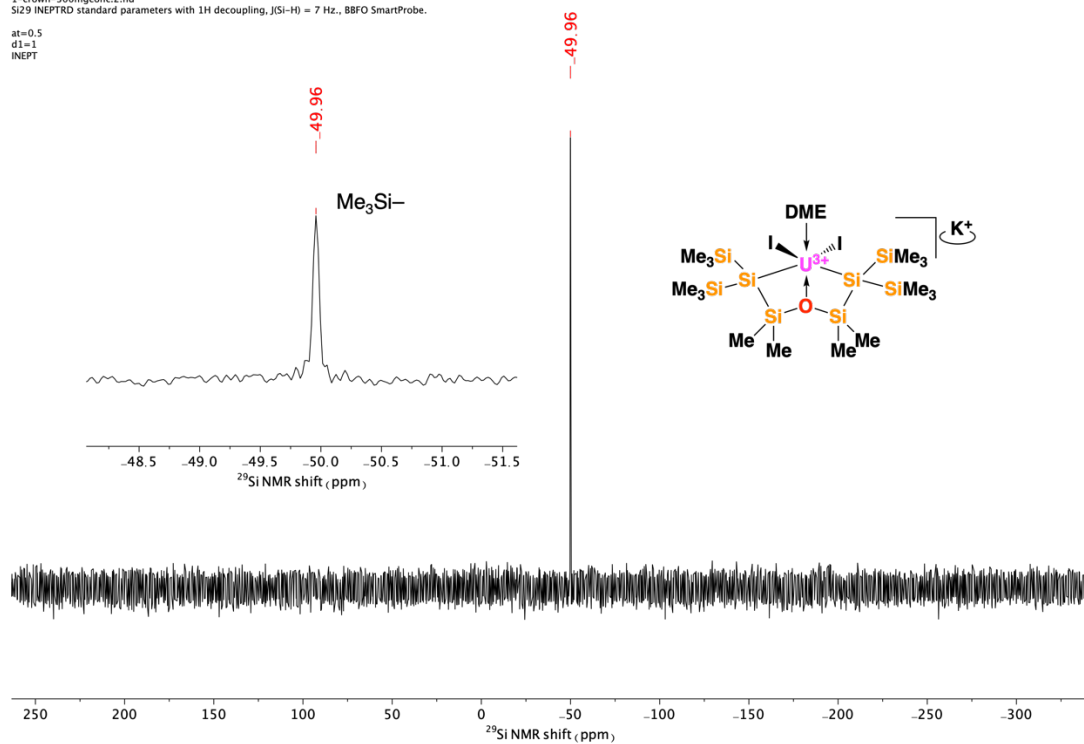

Figure S7.  $^{29}\text{Si}$  INEPT NMR Spectrum (79.49 MHz, 25 °C,  $\text{THF-}d_8$ ) of **1-crown**. (External Standard =  $\text{Si}(\text{SiMe}_3)_4$  = -9.8 ppm)

1-crown-300mgconc.3.fid  
S129 standard parameters with inverse-gated 1H decoupling, BBFO SmartProbe.

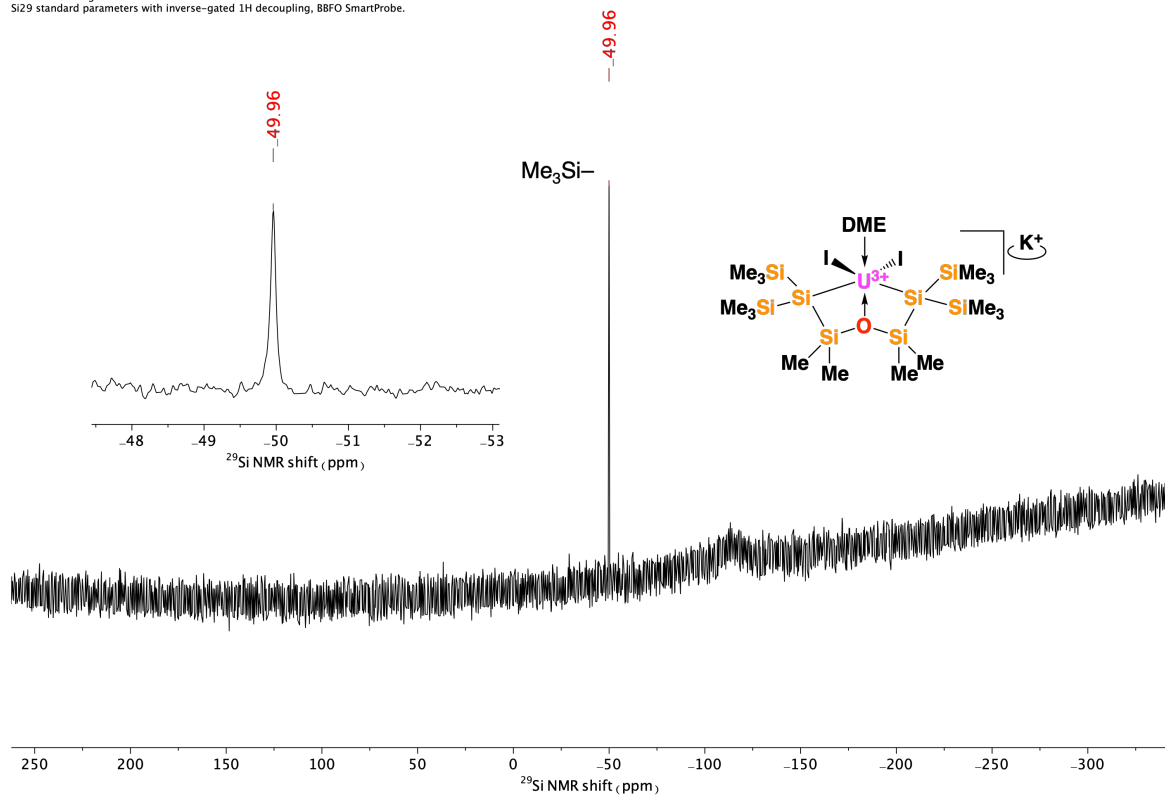

Figure S8.  $^{29}\text{Si}\{^1\text{H}\}$  NMR Spectrum (79.49 MHz, 25 °C,  $\text{THF-}d_8$ ) of **1-crown**. (External Standard =  $\text{Si}(\text{SiMe}_3)_4$  = -9.8 ppm)

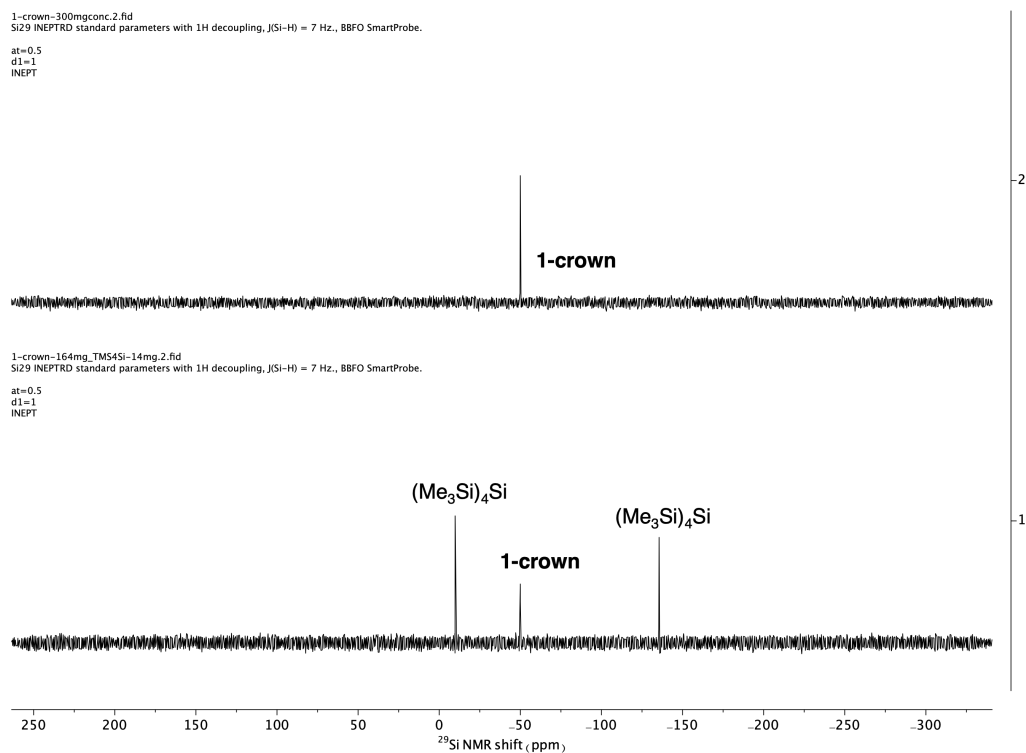

Figure S9. Comparison of <sup>29</sup>Si{<sup>1</sup>H}NMR Spectra (79.49 MHz, 25 °C, THF-*d*<sub>8</sub>) of a purified sample of **1-crown** (top) and a sample of 0.164 g of **1-crown** doped with 0.014 g of Si(SiMe<sub>3</sub>)<sub>4</sub> (a common byproduct) (bottom). (Internal Standard = Si(SiMe<sub>3</sub>)<sub>4</sub> = -9.8 ppm).

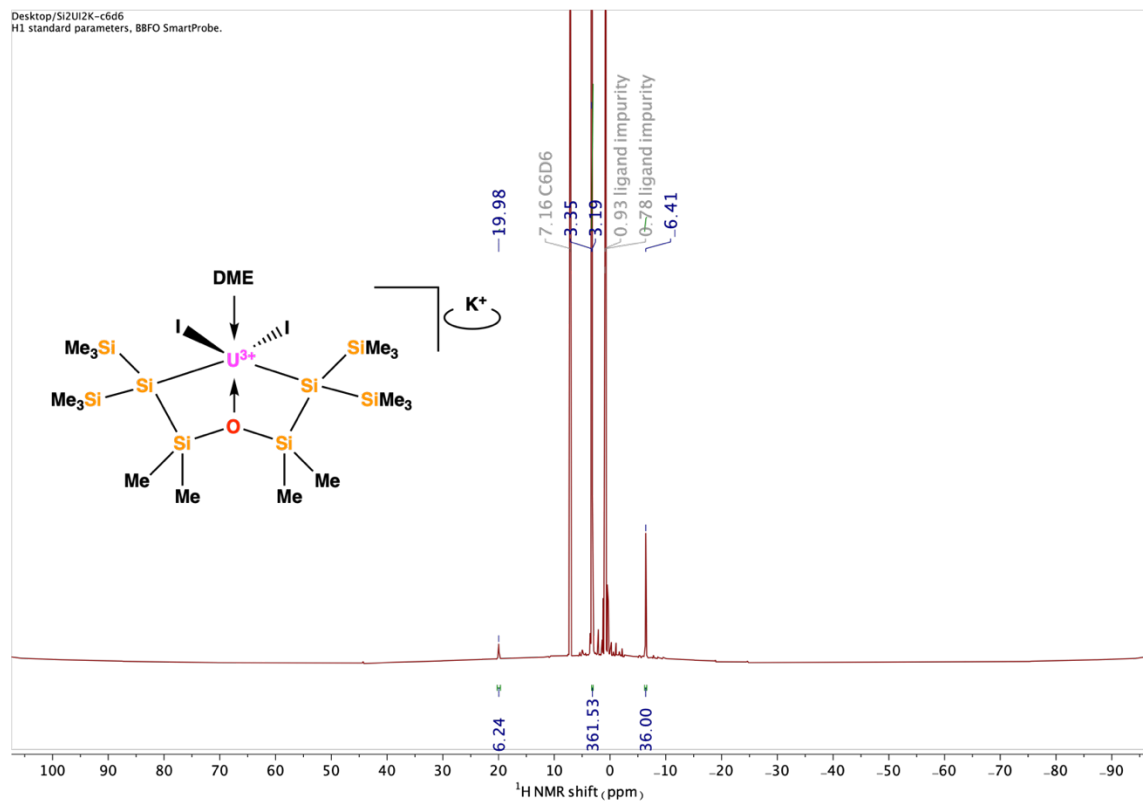

Figure S10. <sup>1</sup>H NMR Spectrum (400 MHz, 26 °C, C<sub>6</sub>D<sub>6</sub>) of **1-crown**.

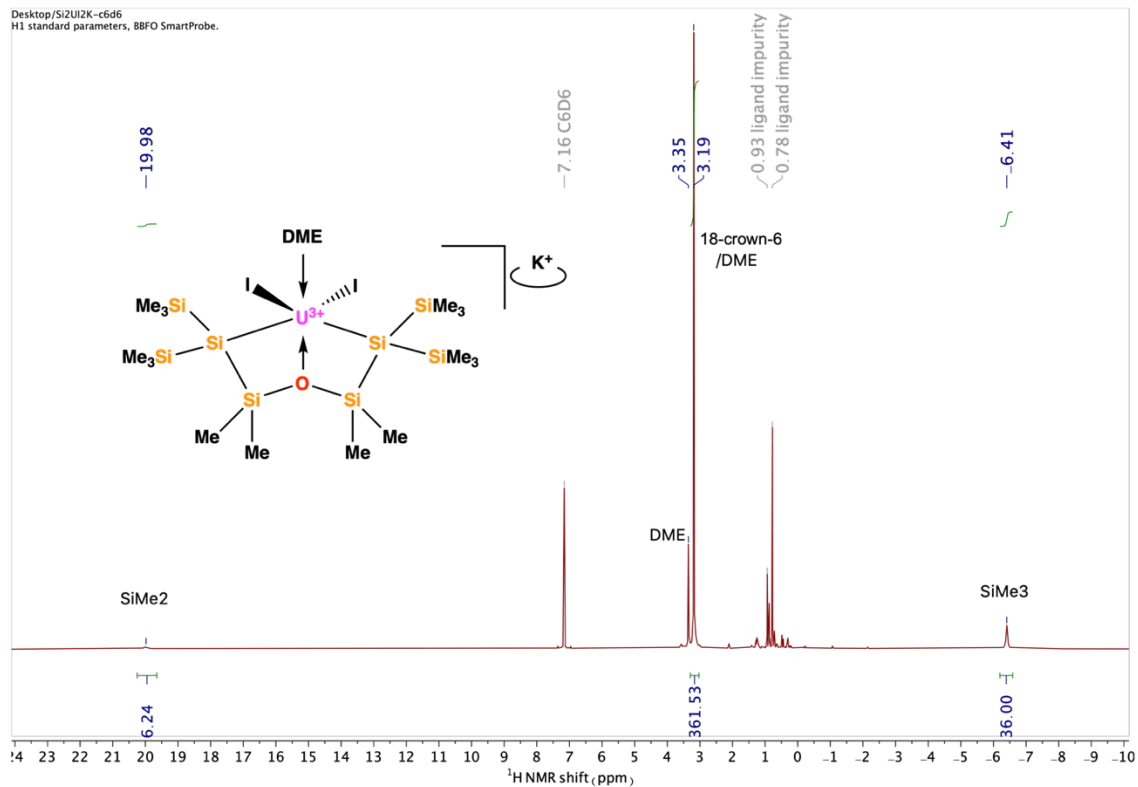

Si2UI2K-pyridined5-Evansmethod.1.fid  
H1 standard parameters, cryoprobe prodigy.

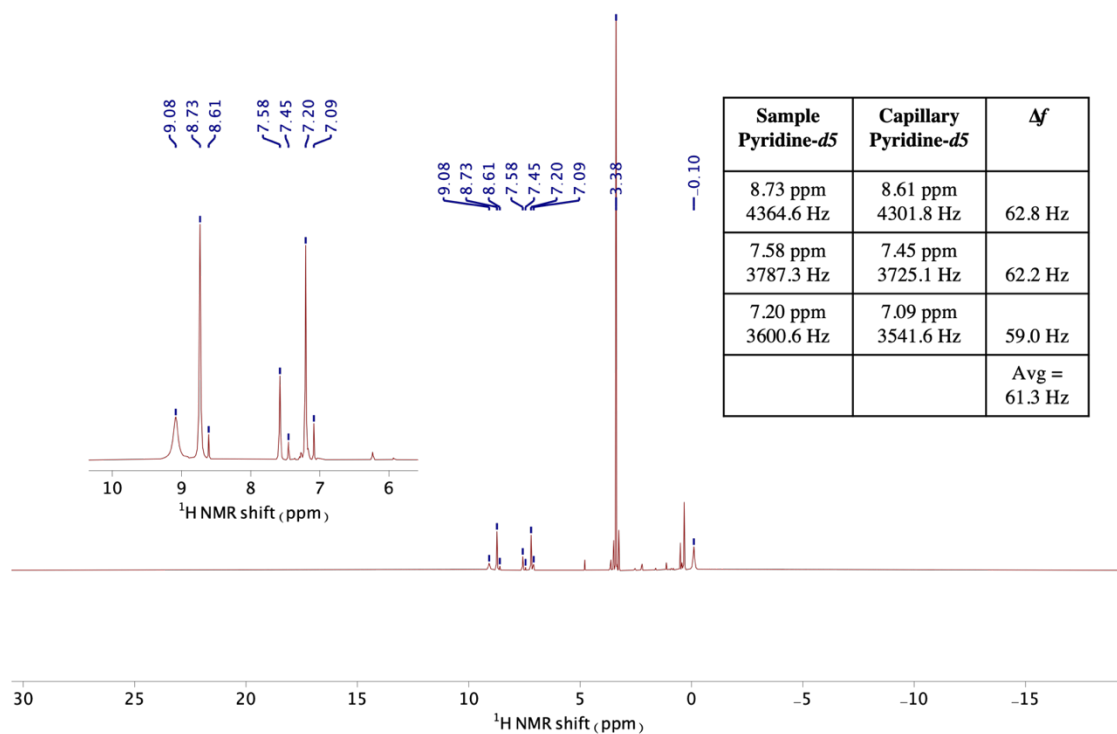

### Evans' Method Calculation for 1-crown

Mass of sample ( $m$ ) = 0.007 g

Molecular weight of **1-crown** = 1366.62 g/mol

Mass of solvent (pyridine- $d_5$ ) = 0.615 g      density = 1.05 g/mL

Volume of solvent = 0.586 mL

Sample Concentration ( $c$ ) = 0.008741 M

Magnet Strength ( $f$ ) = 499.83 MHz

Average  $\Delta f$  = 61.3 Hz

$$\chi_{molar} = \left| \frac{-3 \cdot \Delta f}{4\pi \cdot f \cdot c} \right| = \left| \frac{-3 \cdot [61.3 \text{ Hz}]}{4\pi \cdot [499.83 \text{ MHz}] \cdot [0.008741 \text{ M}]} \right| = 3.3496 \mu_B$$

# Infrared Spectra

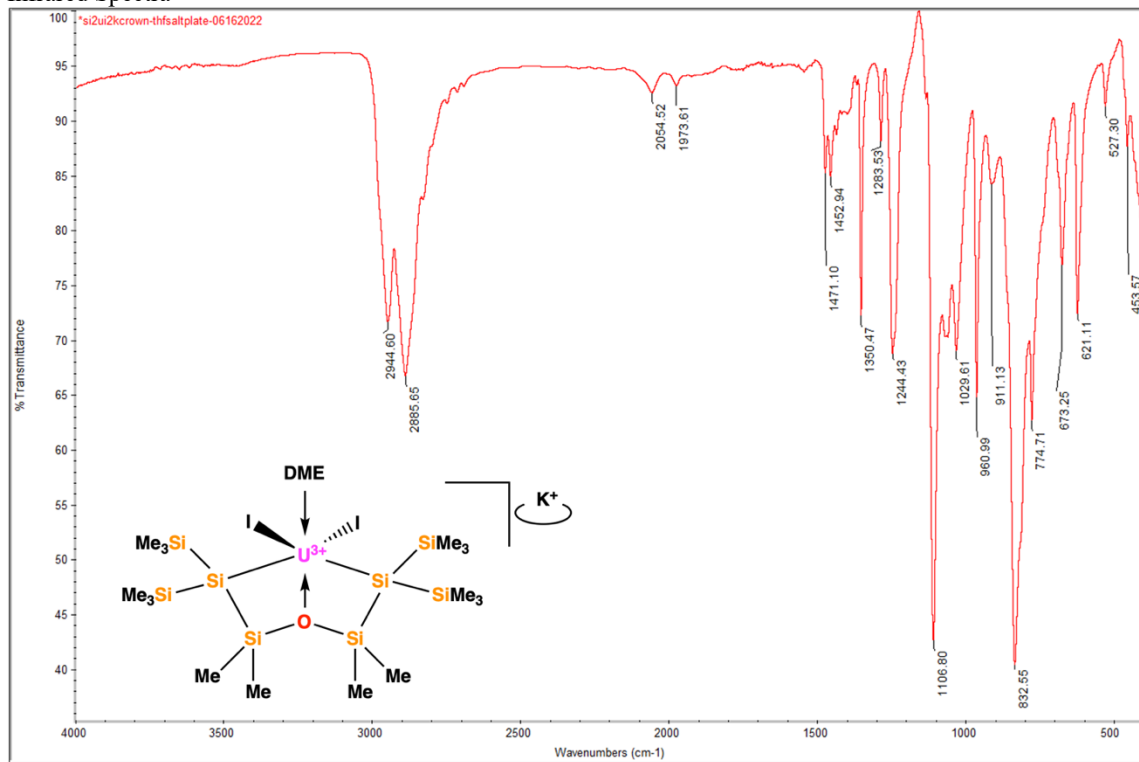

Figure S13. FTIR spectrum (KBr Salt Plate, THF solution) of **1-crown**.

## Crystallographic Details

Table S1. Crystallographic data for compound **1** and **1-crown**.

| Entry                                                                      | <b>1</b>                                                                                                                         | <b>2</b>                                                                                                                           | <b>3</b>                                                                                                                         |
|----------------------------------------------------------------------------|----------------------------------------------------------------------------------------------------------------------------------|------------------------------------------------------------------------------------------------------------------------------------|----------------------------------------------------------------------------------------------------------------------------------|
| Internal Name                                                              | NL_3_122_crown_0m                                                                                                                | NL_3_99_UI3_t2_0m_a                                                                                                                | NLguest3_0m_a                                                                                                                    |
| Crystal data                                                               | <b>1-crown (18-crown-6, DME adduct)</b>                                                                                          | <b>1 (no 18-crown-6, DME adduct)</b>                                                                                               | <b>1-crown (18-crown-6, THF adduct)</b>                                                                                          |
| Chemical formula                                                           | C <sub>32</sub> H <sub>82</sub> I <sub>2</sub> KO <sub>9</sub> Si <sub>8</sub> U·C <sub>4</sub> H <sub>10</sub> O                | C <sub>20</sub> H <sub>58</sub> I <sub>2</sub> O <sub>3</sub> Si <sub>8</sub> U·C <sub>16</sub> H <sub>40</sub> KO <sub>8</sub>    | C <sub>36</sub> H <sub>88</sub> I <sub>2</sub> KO <sub>9</sub> Si <sub>8</sub> U·C <sub>4</sub> H <sub>10</sub> O                |
| $M_r$                                                                      | 1440.74                                                                                                                          | 1462.79                                                                                                                            | 1494.83                                                                                                                          |
| Crystal system, space group                                                | Triclinic, $P\bar{1}$                                                                                                            | Monoclinic, $P2/c$                                                                                                                 | Monoclinic, $C2/c$                                                                                                               |
| Temperature (K)                                                            | 150                                                                                                                              | 150                                                                                                                                | 150                                                                                                                              |
| $a, b, c$ (Å)                                                              | 13.4213 (5), 15.8641 (6), 16.3965 (6)                                                                                            | 14.8717 (5), 15.8095 (5), 28.9025 (9)                                                                                              | 49.049 (13), 13.108 (5), 21.124 (7)                                                                                              |
| $\alpha, \beta, \gamma$ (°)                                                | 104.442 (2), 102.934 (2), 96.066 (2)                                                                                             | 103.785 (2)                                                                                                                        | 90.054 (19)                                                                                                                      |
| $V$ (Å <sup>3</sup> )                                                      | 3246.4 (2)                                                                                                                       | 6599.7 (4)                                                                                                                         | 13581 (8)                                                                                                                        |
| $Z$                                                                        | 2                                                                                                                                | 4                                                                                                                                  | 8                                                                                                                                |
| Radiation type                                                             | Mo $K\alpha$                                                                                                                     | Mo $K\alpha$                                                                                                                       | Mo $K\alpha$                                                                                                                     |
| $\mu$ (mm <sup>-1</sup> )                                                  | 3.7                                                                                                                              | 3.64                                                                                                                               | 3.54                                                                                                                             |
| Crystal size (mm)                                                          | 0.23 × 0.20 × 0.10                                                                                                               | 0.05 × 0.05 × 0.01                                                                                                                 | 0.24 × 0.08 × 0.04                                                                                                               |
| Data collection                                                            |                                                                                                                                  |                                                                                                                                    |                                                                                                                                  |
| Diffractometer                                                             | Bruker AXS D8 Quest diffractometer with PhotonII charge-integrating pixel array detector (CPAD)                                  | Bruker AXS D8 Quest diffractometer with PhotonII charge-integrating pixel array detector (CPAD)                                    | Bruker AXS D8 Quest diffractometer with PhotonII charge-integrating pixel array detector (CPAD)                                  |
| Absorption correction                                                      | Multi-scan <i>SADABS</i> 2016/2: Krause, L., Herbst-Irmer, R., Sheldrick G.M. & Stalke D., <i>J. Appl. Cryst.</i> 48 (2015) 3-10 | Multi-scan <i>SADABS</i> 2016/2: Krause, L., Herbst-Irmer, R., Sheldrick G.M. & Stalke D. (2015). <i>J. Appl. Cryst.</i> 48, 3-10. | Multi-scan <i>SADABS</i> 2016/2: Krause, L., Herbst-Irmer, R., Sheldrick G.M. & Stalke D., <i>J. Appl. Cryst.</i> 48 (2015) 3-10 |
| $T_{\min}, T_{\max}$                                                       | 0.573, 0.747                                                                                                                     | 0.595, 0.747                                                                                                                       | 0.566, 0.746                                                                                                                     |
| No. of measured, independent and observed [ $I > 2\sigma(I)$ ] reflections | 74723, 23927, 19239                                                                                                              | 127091, 25260, 12924                                                                                                               | 179769, 20794, 13797                                                                                                             |
| $R_{\text{int}}$                                                           | 0.042                                                                                                                            | 0.095                                                                                                                              | 0.1                                                                                                                              |
| $(\sin \theta/\lambda)_{\text{max}}$ (Å <sup>-1</sup> )                    | 0.77                                                                                                                             | 0.771                                                                                                                              | 0.716                                                                                                                            |
| Refinement                                                                 |                                                                                                                                  |                                                                                                                                    |                                                                                                                                  |
| $R[F^2 > 2\sigma(F^2)], wR(F^2), S$                                        | 0.029, 0.060, 1.02                                                                                                               | 0.051, 0.128, 1.01                                                                                                                 | 0.043, 0.115, 1.02                                                                                                               |
| No. of reflections                                                         | 23927                                                                                                                            | 25260                                                                                                                              | 20794                                                                                                                            |
| No. of parameters                                                          | 591                                                                                                                              | 611                                                                                                                                | 687                                                                                                                              |
| No. of restraints                                                          | 133                                                                                                                              | 118                                                                                                                                | 300                                                                                                                              |
| H-atom treatment                                                           | H-atom parameters constrained                                                                                                    | H-atom parameters constrained                                                                                                      | H-atom parameters constrained                                                                                                    |
| Weighting scheme                                                           | $w = 1/[\sigma^2(F_o^2) + (0.0186P)^2 + 0.5905P]$<br>where $P = (F_o^2 + 2F_c^2)/3$                                              | $w = 1/[\sigma^2(F_o^2) + (0.0445P)^2 + 5.5493P]$<br>where $P = (F_o^2 + 2F_c^2)/3$                                                | $w = 1/[\sigma^2(F_o^2) + (0.0451P)^2 + 40.3862P]$<br>where $P = (F_o^2 + 2F_c^2)/3$                                             |
| $\Delta\rho_{\text{max}}, \Delta\rho_{\text{min}}$ (e Å <sup>-3</sup> )    | 1.98, -1.40                                                                                                                      | 1.70, -1.53                                                                                                                        | 1.54, -1.59                                                                                                                      |

### Crystallographic References

- 1) Computer programs: Apex4 v2021.4-0 (Bruker, 2021), *SAINTE* V8.40B (Bruker, 2020), *SHELXT* (Sheldrick, 2015), *SHELXL2018/3* (Sheldrick, 2015, 2018), SHELXLE Rev1275(Hübschle *et al.*, 2011).
- 2) Computer programs: Apex4 v2021.4-0 (Bruker, 2021), *SAINTE* V8.40B (Bruker, 2020), *SHELXT* (Sheldrick, 2015), *SHELXL2018/3* (Sheldrick, 2015, 2018), SHELXLE Rev1275(Hübschle *et al.*, 2011).
- 3) Computer programs: Apex4 v2021.4-0 (Bruker, 2021), *SAINTE* V8.40B (Bruker, 2020), *SHELXT* (Sheldrick, 2015), *SHELXL2019/3* (Sheldrick, 2015, 2019), SHELXLE Rev1275(Hübschle *et al.*, 2011).



## Special Refinement Details

- 1) Co-crystallized solvent diethyl ether was positionally disordered and refined as two separate ether molecules (O1E > C4E and O1EB > C4EB). The 1,2 and 1,3 bond distances were restrained to be similar to each other. The  $U_{ij}$  components of the anisotropic displacement parameters for the disordered atoms closer to each other than 2.0 Å were restrained to be similar within a standard deviation of 0.01 Å<sup>2</sup>. Subject to these conditions, the occupancy ratio of the positionally disordered moiety refined to 0.721(11) : 0.279(11).
- 2) There is one coordinating 1,2-dimethoxyethane (DME) molecule per uranium center, each with the central C-C bond on a 2-fold axis coincident with the uranium and silyl-ether oxygen atom (EQIV \$1 2-x, +y, 3/2-z).

The DME molecule with C9, C10, and O2 is disordered about the 2-fold axis and their 1,2 and 1,3 bond distances were restrained to be similar to the well-resolved DME molecule of the potassium countercation C29, O11, C30, C31, O12, and C32.

The DME molecule with C19, C20, and O4 is positionally disordered over two positions and the 1,2 and 1,3 bond distances of the disordered DME were restrained to be similar to half of another well-resolved DME molecule, O5 C22 C21.

In addition, the central C-C bond of each DME molecule (C10A-C10B, C19-C19\_\$1, and C19b-C19b\_\$1) was restrained to 1.49 Å (of a typical central C-C bond of a DME molecule) with an esd of 0.01 Å, resulting in bond lengths of 1.481(8), 1.489(9), and 1.485(10) Å, respectively.

The  $U_{ij}$  components of the anisotropic displacement parameters for disordered atoms closer to each other than 2.0 Å were restrained to be similar within a standard deviation of 0.01 Å<sup>2</sup>.

Subject to these conditions, the occupancy ratio of the positionally disordered moiety refined to 0.743(13) : 0.257(13).

- 3) Six reflections were obstructed by the beamstop and were omitted from refinement.

---

A mild anti-bumping restraint (BUMP -0.02) was applied to prevent atoms of minor disordered moieties approaching each other too closely.

---

THF molecule disorder:

One of the two THF molecules on the uranium center was found to be disordered (O2). The 1,2 and 1,3 distances for disordered moieties were restrained to be similar to each other. The position and  $U_{ij}$  of the anisotropic displacement parameters (ADPs) were constrained to be the same for atoms O2 and O2B.

The THF molecule containing O3 was initially modelled as disordered. However, the second disordered moiety was found to be < 5% and thus was omitted from further disorder modelling (FVAR 3 = 0.96824) and was refined to be fully occupied during the final refinement process.

The  $U_{ij}$  components of ADPs for disordered atoms closer to each other than 2.0 Å were restrained to be similar with an esd of 0.01 Å<sup>2</sup>.

Under these conditions, the THF O2/O2B disorder was found to have an occupancy ratio of 0.613(11) : 0.387(11).

---

Diethyl ether molecule disorder:

There is an outersphere diethyl ether molecule that was found to be disordered over two positions over an inversion center, defining four different positions for one ether molecule. The 1,2 and 1,3 distances for disordered ether molecules were restrained to be similar to those of a well-defined ether molecule (which has O10 on an inversion center).

The  $U_{ij}$  components of ADPs for disordered atoms closer to each other than 2.0 Å were restrained to be similar with an esd of 0.01 Å<sup>2</sup>.

Under these conditions, the diethyl ether molecule O11/O11B was found to have an occupancy ratio of 0.291(13) : 0.209(13). Thus, a PART ratio of 0.582(26) : 0.418(26).

## Tables of Geometric Parameters

Table S2. Selected geometric parameters of compound **1** (Å, °)

|                          |              |                           |              |
|--------------------------|--------------|---------------------------|--------------|
| U1—O2A                   | 2.553 (18)   | U2—Si6                    | 3.1457 (13)  |
| U1—O1                    | 2.587 (4)    | Si1—O1                    | 1.6971 (19)  |
| U1—O2B                   | 2.71 (2)     | Si1—Si2                   | 2.3084 (18)  |
| U1—I1                    | 3.1065 (4)   | Si2—Si4                   | 2.3299 (18)  |
| U1—Si2                   | 3.1281 (12)  | Si2—Si3                   | 2.3445 (19)  |
| U2—O3                    | 2.528 (4)    | Si5—O3                    | 1.7163 (19)  |
| U2—O4B                   | 2.61 (3)     | Si5—Si6                   | 2.3197 (18)  |
| U2—O4                    | 2.622 (10)   | Si6—Si7                   | 2.3352 (18)  |
| U2—I2                    | 3.1319 (3)   | Si6—Si8                   | 2.3463 (18)  |
|                          |              |                           |              |
| O2A—U1—O2B               | 62.3 (2)     | O4B—U2—O4B <sup>ii</sup>  | 62.4 (13)    |
| O1—U1—I1 <sup>i</sup>    | 100.422 (10) | O4—U2—I2 <sup>ii</sup>    | 88.88 (19)   |
| O1—U1—I1                 | 100.421 (10) | I2—U2—I2 <sup>ii</sup>    | 162.177 (16) |
| I1 <sup>i</sup> —U1—I1   | 159.157 (19) | Si6 <sup>ii</sup> —U2—Si6 | 129.96 (5)   |
| Si2 <sup>i</sup> —U1—Si2 | 128.94 (5)   |                           |              |
|                          |              |                           |              |
| Si2—Si1—O1—U1            | 23.17 (6)    | Si6—Si5—O3—U2             | 23.70 (6)    |

Symmetry code(s): (i)  $-x+1, y, -z+1/2$ ; (ii)  $-x+2, y, -z+3/2$ .

Table S3. Selected geometric parameters of compound **1-crown (DME adduct)** (Å, °).

|             |              |            |              |
|-------------|--------------|------------|--------------|
| U1—O1       | 2.5613 (13)  | U1—I1      | 3.1256 (2)   |
| U1—O2'      | 2.6149 (17)  | U1—Si2'    | 3.1276 (6)   |
| U1—O2       | 2.6384 (16)  | Si1—O1     | 1.7041 (15)  |
| U1—I1'      | 3.1125 (2)   | O1—Si1'    | 1.7078 (15)  |
| U1—Si2      | 3.1149 (6)   | I1'—K1     | 3.4608 (5)   |
|             |              |            |              |
| Si2—U1—Si2' | 130.014 (16) | O2'—U1—O2  | 62.83 (6)    |
| O1—U1—Si2   | 64.83 (3)    | O2'—U1—I1' | 87.61 (5)    |
| O1—U1—O2'   | 149.64 (6)   | O2—U1—Si2  | 83.11 (4)    |
| O1—U1—O2    | 147.51 (6)   | O2—U1—I1'  | 79.16 (4)    |
| O1—U1—I1'   | 96.82 (3)    | I1'—U1—I1  | 164.321 (6)  |
| O2'—U1—Si2  | 145.13 (5)   | U1—I1'—K1  | 135.435 (11) |

Table S4. Selected geometric parameters of compound **1-crown (THF adduct)** (Å, °).

|                |              |                       |             |
|----------------|--------------|-----------------------|-------------|
| U1—O1          | 2.553 (3)    | U1—Si1                | 3.1713 (14) |
| U1—O3          | 2.578 (3)    | I2—K1 <sup>i</sup>    | 3.3535 (13) |
| U1—O2B         | 2.579 (3)    | Si1—Si2               | 2.3123 (18) |
| U1—O2          | 2.579 (3)    | Si2—O1                | 1.703 (3)   |
| U1—I2          | 3.0845 (10)  | Si3—O1                | 1.709 (3)   |
| U1—I1          | 3.1086 (11)  | Si3—Si4               | 2.3080 (19) |
| U1—Si4         | 3.1377 (15)  |                       |             |
|                |              |                       |             |
| O1—U1—O3       | 144.61 (10)  | O2B—U1—Si4            | 147.54 (9)  |
| O1—U1—O2B      | 147.15 (11)  | O2—U1—Si4             | 147.54 (9)  |
| O1—U1—O2       | 147.15 (11)  | I2—U1—Si4             | 89.83 (3)   |
| O3—U1—O2       | 68.06 (12)   | I1—U1—Si4             | 99.25 (3)   |
| O1—U1—I2       | 94.13 (7)    | O1—U1—Si1             | 64.82 (7)   |
| O3—U1—I2       | 85.41 (9)    | O3—U1—Si1             | 150.52 (8)  |
| O2B—U1—I2      | 83.53 (10)   | O2B—U1—Si1            | 82.46 (10)  |
| O2—U1—I2       | 83.53 (10)   | O2—U1—Si1             | 82.46 (10)  |
| O1—U1—I1       | 99.34 (7)    | I2—U1—Si1             | 91.46 (3)   |
| O3—U1—I1       | 85.78 (9)    | I1—U1—Si1             | 90.88 (3)   |
| O2B—U1—I1      | 83.11 (10)   | Si4—U1—Si1            | 129.59 (4)  |
| O2—U1—I1       | 83.11 (10)   | U1—I2—K1 <sup>i</sup> | 158.24 (2)  |
| I2—U1—I1       | 166.017 (13) | Si2—Si1—U1            | 78.92 (5)   |
| O1—U1—Si4      | 64.83 (7)    | Si3—Si4—U1            | 79.88 (5)   |
| O3—U1—Si4      | 79.78 (9)    |                       |             |
|                |              |                       |             |
| Si1—Si2—O1—Si3 | 155.7 (3)    | Si4—Si3—O1—Si2        | 162.7 (3)   |
| Si1—Si2—O1—U1  | -20.94 (15)  | Si4—Si3—O1—U1         | -20.71 (15) |

Symmetry code(s): (i) x, -y+1, z-1/2.

## SolidG of Complex 1

| Ligand                    | % shielding           |
|---------------------------|-----------------------|
| Silyl ligand (tridentate) | 45.24                 |
| DME (bidentate)           | 22.25                 |
| Iodide #1                 | 10.98                 |
| Iodide #2                 | 10.97                 |
| SUM:                      | 89.44 (0.73% overlap) |
| Without DME:              | 67.19                 |

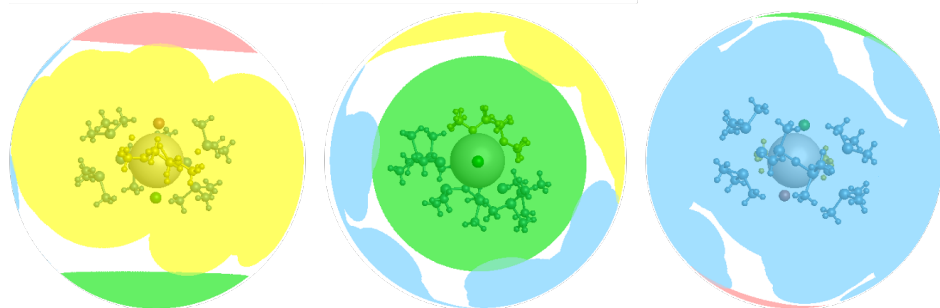

Figure S14. **1-crown (DME adduct) 18-crown-6(K<sup>+</sup>)** and solvent molecules removed from the .xyz file.<sup>[5]</sup>

```

+-----+
|               Program Solid-G. Ver 0.25, October 09, 2006.               |
|               The Molecular Structure Laboratory                          |
|               Chemistry Department, University of Wisconsin-Madison      |
+-----+
| Structure from Si2UI2K_nocrown.xyz                                     on 9/26/2023 9:11:55 AM |
+-----+

```

Table 1. Complex composition, atomic coordinates and radii

| Atom | L  | X       | Y       | Z       | Cov   | vdW   | ZER   |
|------|----|---------|---------|---------|-------|-------|-------|
| U1   | 0  | -0.0000 | 0.0000  | -0.0000 | 1.713 | 3.050 | 2.285 |
| Si8  | 1  | -4.4426 | -1.3730 | -1.8644 | 0.900 | 2.205 | 1.834 |
| Si7  | 1  | -1.4646 | -1.7709 | -4.0847 | 0.900 | 2.205 | 1.834 |
| Si6  | 1  | -2.1128 | -1.3480 | -1.8717 | 0.900 | 2.205 | 1.834 |
| Si5  | 1  | -1.4641 | -3.1777 | -0.6226 | 0.900 | 2.205 | 1.834 |
| Si4  | 1* | 4.4427  | -1.3730 | 1.8644  | 0.900 | 2.205 | 1.834 |
| Si3  | 1  | 1.4646  | -1.7709 | 4.0848  | 0.900 | 2.205 | 1.834 |
| Si2  | 1  | 2.1129  | -1.3480 | 1.8717  | 0.900 | 2.205 | 1.834 |
| Si1  | 1* | 1.4641  | -3.1777 | 0.6226  | 0.900 | 2.205 | 1.834 |
| O1   | 1* | -0.0000 | -2.5872 | -0.0000 | 0.620 | 1.697 | 1.471 |
| H9   | 1  | -0.2042 | -3.4878 | 3.8782  | 0.371 | 1.675 | 1.000 |
| H8   | 1  | -0.4973 | -2.6145 | 5.1868  | 0.371 | 1.675 | 1.000 |
| H7   | 1  | -0.8975 | -2.0518 | 3.7431  | 0.371 | 1.675 | 1.000 |
| H6   | 1  | 1.9651  | -5.1618 | 1.8584  | 0.371 | 1.675 | 1.000 |
| H58  | 1  | -4.6796 | -0.3067 | 0.2582  | 0.371 | 1.675 | 1.000 |
| H57  | 1  | -6.0967 | -0.8801 | -0.2153 | 0.371 | 1.675 | 1.000 |
| H56  | 1  | -5.0001 | -1.8679 | 0.4034  | 0.371 | 1.675 | 1.000 |
| H55  | 1  | -6.2207 | -2.8648 | -2.4085 | 0.371 | 1.675 | 1.000 |
| H54  | 1  | -4.9722 | -3.1439 | -3.3700 | 0.371 | 1.675 | 1.000 |
| H53  | 1  | -4.9660 | -3.6988 | -1.8690 | 0.371 | 1.675 | 1.000 |
| H52  | 1  | -4.6347 | 0.8577  | -2.7090 | 0.371 | 1.675 | 1.000 |
| H51  | 1  | -4.8715 | -0.1870 | -3.8980 | 0.371 | 1.675 | 1.000 |

|     |    |         |         |         |       |       |       |
|-----|----|---------|---------|---------|-------|-------|-------|
| H50 | 1  | -6.0425 | 0.1096  | -2.8483 | 0.371 | 1.675 | 1.000 |
| H5  | 1  | 0.4375  | -4.7510 | 2.1008  | 0.371 | 1.675 | 1.000 |
| H49 | 1  | -3.4825 | -2.3955 | -5.2123 | 0.371 | 1.675 | 1.000 |
| H48 | 1  | -2.2339 | -3.1057 | -5.9178 | 0.371 | 1.675 | 1.000 |
| H47 | 1  | -2.8184 | -3.6910 | -4.5478 | 0.371 | 1.675 | 1.000 |
| H46 | 1  | -0.7516 | 0.4656  | -4.5592 | 0.371 | 1.675 | 1.000 |
| H45 | 1  | -1.0514 | -0.3024 | -5.9309 | 0.371 | 1.675 | 1.000 |
| H44 | 1  | -2.2611 | 0.2695  | -5.0530 | 0.371 | 1.675 | 1.000 |
| H43 | 1  | 0.2043  | -3.4878 | -3.8782 | 0.371 | 1.675 | 1.000 |
| H42 | 1  | 0.4974  | -2.6145 | -5.1868 | 0.371 | 1.675 | 1.000 |
| H41 | 1  | 0.8976  | -2.0518 | -3.7430 | 0.371 | 1.675 | 1.000 |
| H40 | 1  | -1.9650 | -5.1618 | -1.8584 | 0.371 | 1.675 | 1.000 |
| H4  | 1  | 0.8624  | -5.4880 | 0.7453  | 0.371 | 1.675 | 1.000 |
| H39 | 1  | -0.4374 | -4.7510 | -2.1008 | 0.371 | 1.675 | 1.000 |
| H38 | 1  | -0.8623 | -5.4880 | -0.7453 | 0.371 | 1.675 | 1.000 |
| H37 | 1  | -2.7075 | -2.6500 | 1.3310  | 0.371 | 1.675 | 1.000 |
| H36 | 1  | -3.3900 | -3.8841 | 0.5743  | 0.371 | 1.675 | 1.000 |
| H35 | 1  | -2.0836 | -4.1173 | 1.4689  | 0.371 | 1.675 | 1.000 |
| H3  | 1  | 2.7076  | -2.6500 | -1.3310 | 0.371 | 1.675 | 1.000 |
| H24 | 1  | 4.6797  | -0.3067 | -0.2582 | 0.371 | 1.675 | 1.000 |
| H23 | 1  | 6.0968  | -0.8801 | 0.2153  | 0.371 | 1.675 | 1.000 |
| H22 | 1  | 5.0002  | -1.8679 | -0.4034 | 0.371 | 1.675 | 1.000 |
| H21 | 1  | 6.2208  | -2.8648 | 2.4085  | 0.371 | 1.675 | 1.000 |
| H20 | 1  | 4.9723  | -3.1439 | 3.3700  | 0.371 | 1.675 | 1.000 |
| H2  | 1  | 3.3901  | -3.8841 | -0.5743 | 0.371 | 1.675 | 1.000 |
| H19 | 1  | 4.9660  | -3.6988 | 1.8690  | 0.371 | 1.675 | 1.000 |
| H18 | 1  | 4.6347  | 0.8577  | 2.7090  | 0.371 | 1.675 | 1.000 |
| H17 | 1  | 4.8716  | -0.1870 | 3.8980  | 0.371 | 1.675 | 1.000 |
| H16 | 1  | 6.0426  | 0.1096  | 2.8483  | 0.371 | 1.675 | 1.000 |
| H15 | 1  | 3.4826  | -2.3955 | 5.2124  | 0.371 | 1.675 | 1.000 |
| H14 | 1  | 2.2340  | -3.1057 | 5.9178  | 0.371 | 1.675 | 1.000 |
| H13 | 1  | 2.8184  | -3.6910 | 4.5478  | 0.371 | 1.675 | 1.000 |
| H12 | 1  | 0.7517  | 0.4656  | 4.5592  | 0.371 | 1.675 | 1.000 |
| H11 | 1  | 1.0514  | -0.3024 | 5.9309  | 0.371 | 1.675 | 1.000 |
| H10 | 1  | 2.2612  | 0.2695  | 5.0531  | 0.371 | 1.675 | 1.000 |
| H1  | 1  | 2.0837  | -4.1173 | -1.4688 | 0.371 | 1.675 | 1.000 |
| C8  | 1  | 5.1374  | -1.0711 | 0.1488  | 0.670 | 1.825 | 1.539 |
| C7  | 1  | 5.2456  | -2.9587 | 2.4477  | 0.670 | 1.825 | 1.539 |
| C6  | 1  | 5.0734  | 0.0182  | 2.9614  | 0.670 | 1.825 | 1.539 |
| C5  | 1  | 2.6405  | -2.8733 | 5.0582  | 0.670 | 1.825 | 1.539 |
| C4  | 1  | 1.3712  | -0.1383 | 5.0189  | 0.670 | 1.825 | 1.539 |
| C3  | 1  | -0.2390 | -2.5793 | 4.2414  | 0.670 | 1.825 | 1.539 |
| C20 | 1  | -5.1373 | -1.0711 | -0.1488 | 0.670 | 1.825 | 1.539 |
| C2  | 1  | 1.1442  | -4.8432 | 1.4282  | 0.670 | 1.825 | 1.539 |
| C19 | 1  | -5.2455 | -2.9587 | -2.4477 | 0.670 | 1.825 | 1.539 |
| C18 | 1  | -5.0734 | 0.0182  | -2.9614 | 0.670 | 1.825 | 1.539 |
| C17 | 1  | -2.6405 | -2.8733 | -5.0582 | 0.670 | 1.825 | 1.539 |
| C16 | 1  | -1.3711 | -0.1383 | -5.0189 | 0.670 | 1.825 | 1.539 |
| C15 | 1  | 0.2391  | -2.5793 | -4.2414 | 0.670 | 1.825 | 1.539 |
| C14 | 1  | -1.1442 | -4.8432 | -1.4282 | 0.670 | 1.825 | 1.539 |
| C13 | 1  | -2.5378 | -3.4947 | 0.8637  | 0.670 | 1.825 | 1.539 |
| C1  | 1  | 2.5379  | -3.4947 | -0.8637 | 0.670 | 1.825 | 1.539 |
| O3  | 2* | -1.0212 | 2.3327  | -0.9291 | 0.620 | 1.697 | 1.471 |
| O2  | 2* | 0.9131  | 2.1699  | 0.9881  | 0.620 | 1.697 | 1.471 |
| H68 | 2  | 0.7225  | 2.6273  | 2.8651  | 0.371 | 1.675 | 1.000 |
| H67 | 2  | 0.7321  | 3.1975  | -1.5153 | 0.371 | 1.675 | 1.000 |
| H66 | 2  | -2.7498 | 2.6795  | -1.2990 | 0.371 | 1.675 | 1.000 |
| H65 | 2  | 1.7960  | 1.4852  | 2.5426  | 0.371 | 1.675 | 1.000 |
| H64 | 2  | 2.1906  | 3.0263  | 2.3687  | 0.371 | 1.675 | 1.000 |
| H63 | 2  | -0.4743 | 3.6697  | 1.0249  | 0.371 | 1.675 | 1.000 |
| H62 | 2  | 0.9222  | 4.3021  | 0.5522  | 0.371 | 1.675 | 1.000 |
| H61 | 2  | -0.5573 | 4.1277  | -1.2730 | 0.371 | 1.675 | 1.000 |
| H60 | 2  | -1.7156 | 3.2295  | -2.3894 | 0.371 | 1.675 | 1.000 |
| H59 | 2  | -2.1417 | 1.6870  | -2.3972 | 0.371 | 1.675 | 1.000 |

|     |    |         |        |         |       |       |       |
|-----|----|---------|--------|---------|-------|-------|-------|
| H34 | 2  | -1.7960 | 1.4852 | -2.5426 | 0.371 | 1.675 | 1.000 |
| H33 | 2  | -2.1905 | 3.0263 | -2.3687 | 0.371 | 1.675 | 1.000 |
| H32 | 2  | -0.7224 | 2.6273 | -2.8651 | 0.371 | 1.675 | 1.000 |
| H31 | 2  | 0.4743  | 3.6697 | -1.0249 | 0.371 | 1.675 | 1.000 |
| H30 | 2  | -0.9222 | 4.3021 | -0.5522 | 0.371 | 1.675 | 1.000 |
| H29 | 2  | -0.7321 | 3.1975 | 1.5153  | 0.371 | 1.675 | 1.000 |
| H28 | 2  | 0.5574  | 4.1277 | 1.2730  | 0.371 | 1.675 | 1.000 |
| H27 | 2  | 1.7157  | 3.2295 | 2.3894  | 0.371 | 1.675 | 1.000 |
| H26 | 2  | 2.1418  | 1.6870 | 2.3972  | 0.371 | 1.675 | 1.000 |
| H25 | 2  | 2.7499  | 2.6795 | 1.2990  | 0.371 | 1.675 | 1.000 |
| C9  | 2  | 1.9550  | 2.4624 | 1.8274  | 0.670 | 1.825 | 1.539 |
| C12 | 2  | -1.4671 | 2.3707 | -2.2821 | 0.670 | 1.825 | 1.539 |
| C11 | 2  | -0.3296 | 3.5137 | -0.4688 | 0.670 | 1.825 | 1.539 |
| C10 | 2  | 0.0669  | 3.3319 | 0.9460  | 0.670 | 1.825 | 1.539 |
| I2  | 3* | 2.0043  | 0.5619 | -2.3059 | 1.233 | 2.291 | 1.941 |
| I1  | 4* | -2.0043 | 0.5619 | 2.3060  | 1.233 | 2.291 | 1.941 |

Legend:

L - ligand #, atoms connected to U1 are marked with a \*,  
X,Y,Z, - Cartesian coordinates,  
Cov - covalent radius,  
vdW, - van der Waals radius,  
ZER - Zero Energy Radius, at R(E=0)

Table 2. Ligand Composition and Coordination

| Ligand | H | Atoms | Formula     | U1-L  | Coordinated atoms |
|--------|---|-------|-------------|-------|-------------------|
| 1      | 3 | 73    | H48C16O1Si8 | 3.198 | Si4 Si1 O1        |
| 2      | 2 | 26    | H20C4O2     | 2.252 | O3 O2             |
| 3      | 1 | 1     | I1          | 3.106 | I2                |
| 4      | 1 | 1     | I1          | 3.107 | I1                |

Legend:

Ligand - ligand number,  
H - ligand hapticity,  
Atoms - number of atoms in the ligand,  
U1-L - distance between U1 and the geometrical center of the shape formed by the coordinated atoms,  
CA - list of atoms coordinated to U1.

Table 3. Coordinated Atom Data

| Atom | U1 -Atom Distance<br>Angstroms | Atom Solid Angle<br>Steradians | Atom Cone Angle<br>Degrees |
|------|--------------------------------|--------------------------------|----------------------------|
| Si4  | 5.0099                         | 0.44                           | 42.95                      |
| Si1  | 3.5537                         | 0.90                           | 62.14                      |
| O1   | 2.5872                         | 1.11                           | 69.30                      |
| O3   | 2.7106                         | 1.01                           | 65.73                      |
| O2   | 2.5531                         | 1.15                           | 70.36                      |
| I2   | 3.1065                         | 1.38                           | 77.34                      |
| I1   | 3.1065                         | 1.38                           | 77.34                      |

Table 4. Ligand Angle Calculations

| Ligand # | Omega(L)<br>Steradians | G(L)<br>Percent | Equivalent Cone Angle (ECA)<br>Degrees |
|----------|------------------------|-----------------|----------------------------------------|
|----------|------------------------|-----------------|----------------------------------------|

|            |       |       |                        |
|------------|-------|-------|------------------------|
| 1          | 5.68  | 45.24 | 169.07                 |
| 2          | 2.80  | 22.25 | 112.58                 |
| 3          | 1.38  | 10.98 | 77.40                  |
| 4          | 1.38  | 10.97 | 77.37                  |
| -----      |       |       |                        |
| SUM(G(L))  | 11.24 | 89.44 |                        |
| G(complex) | 11.15 | 88.71 |                        |
| G(gamma)   | 0.09  | 0.73  |                        |
| -----      |       |       |                        |
| G(U1 )     | 6.80  | 54.09 | Si4 Si1 O1 O3 O2 I2 I1 |
| -----      |       |       |                        |
| S(U1 )     | 6.21  | 49.41 | Si1 O1 O3 O2 I2 I1     |
| -----      |       |       |                        |

Legend:

Ligand - Ligand #,  
Omega(L) - Solid Angle of the Ligand,  
G(L) - The percentage of the sphere shielded by the ligand,  
ECA - Cone angle corresponding to the Omega(L) and not Tolman's cone angle for the ligand. The ECA is usually smaller than Tolman's cone angle since this program does not assume free rotation about the M-L axis.

SUM(G(L)) - The sum of all individual ligand G(L) values,  
G(complex) - The G value for the complex, all ligands treated as one,  
G(gamma) - The percentage of the sphere shielded by more than one ligand.  
G(U1 ) - The percentage of U1 's surface shielded by the ligated atoms only,  
S(U1 ) - The percentage of U1 's surface "in contact" with the ligated atoms.

Table 5. Unfavorable Close Contacts Between Atoms

No Unfavorable Interligand Interactions Found.

Table 6. Normalization to M-L=2.28 Angstroms

| Ligand | Omega(L)<br>Steradians | G2.28(L)<br>Percent | Equivalent Cone Angle (ECA)<br>Degrees |
|--------|------------------------|---------------------|----------------------------------------|
| 1      | 6.87                   | 54.64               | 190.65                                 |
| 2      | 2.76                   | 21.94               | 111.74                                 |
| 3      | 2.99                   | 23.78               | 116.73                                 |
| 4      | 2.99                   | 23.78               | 116.74                                 |

Legend:

Ligand - Ligand #,  
Omega(L) - Solid Angle of the Ligand normalized to M-L=2.28 A,  
G2.28(L) - The normalized percentage of the sphere shielded by the ligand,  
ECA - Cone angle corresponding to the Omega(L) and not Tolman's cone angle for the ligand. The ECA is always smaller than Tolman's cone angle since this program does not assume free rotation about the M-L axis.

+-----+  
| Output written to Si2UI2K\_nocrown.out. |  
| Computation Time: 4.17 seconds. Completed on 9/26/2023 9:12:00 AM |  
+-----+



## References

- (1) Pangborn, A. B.; Giardello, M. A.; Grubbs, R. H.; Rosen, R. K.; Timmers, F. J. Safe and Convenient Procedure for Solvent Purification. *Organometallics* **1996**, *15* (5), 1518–1520. <https://doi.org/10.1021/om9503712>.
- (2) Monreal, M. J.; Thomson, R. K.; Cantat, T.; Travia, N. E.; Scott, B. L.; Kiplinger, J. L. UI4(1,4-dioxane)2, [UCl4(1,4-dioxane)]2, and UI3(1,4-dioxane)1.5: Stable and Versatile Starting Materials for Low- and High-Valent Uranium Chemistry. *Organometallics* 2011, *30*, 2031–2038. [dx.doi.org/10.1021/om200093q](https://doi.org/10.1021/om200093q)
- (3) Zitz, R.; Hlina, J.; Aghazadeh Meshgi, M.; Krenn, H.; Marschner, C.; Szilvási, T.; Baumgartner, J. Using Functionalized Silyl Ligands To Suppress Solvent Coordination to Silyl Lanthanide(II) Complexes. *Inorg. Chem.* **2017**, *56* (9), 5328–5341. <https://doi.org/10.1021/acs.inorgchem.7b00420>.
- (4) Blinka, T. A.; Helmer, B. J.; West, R. Polarization Transfer NMR Spectroscopy for Silicon-29: The INEPT and DEPT Techniques. In *Advances in Organometallic Chemistry*; Elsevier, 1984; Vol. 23, pp 193–218. [https://doi.org/10.1016/S0065-3055\(08\)60611-5](https://doi.org/10.1016/S0065-3055(08)60611-5).
- (5) Guzei, I. A.; Wendt, M. An Improved Method for the Computation of Ligand Steric Effects Based on Solid Angles. *Dalton Trans.* **2006**, No. 33, 3991–3999. <https://doi.org/10.1039/B605102B>.
